# Supplementary material for: Functional Effects In Silico Prediction for Androgen Receptor Ligand-Binding Domain Novel I836S Mutation
Source: Life (Basel). 2021 Jul 6;11(7):659. doi: 10.3390/life11070659 (PMC8303243; doi:10.3390/life11070659)
Supplement: Supplementary file 1 [file life-11-00659-s001.zip › life-1219629-supplementary.pdf]

# Functional Effects *in silico* Prediction for Androgen Receptor Ligand-binding Domain Novel I836S Mutation

Alexey Rayevsky, Dmytro Sirokha, Dariia Samofalova, Dmytro Lozhko, Olexandra Gorodna, Inga Prokopenko, Liudmyla Livshits

## Supplementary

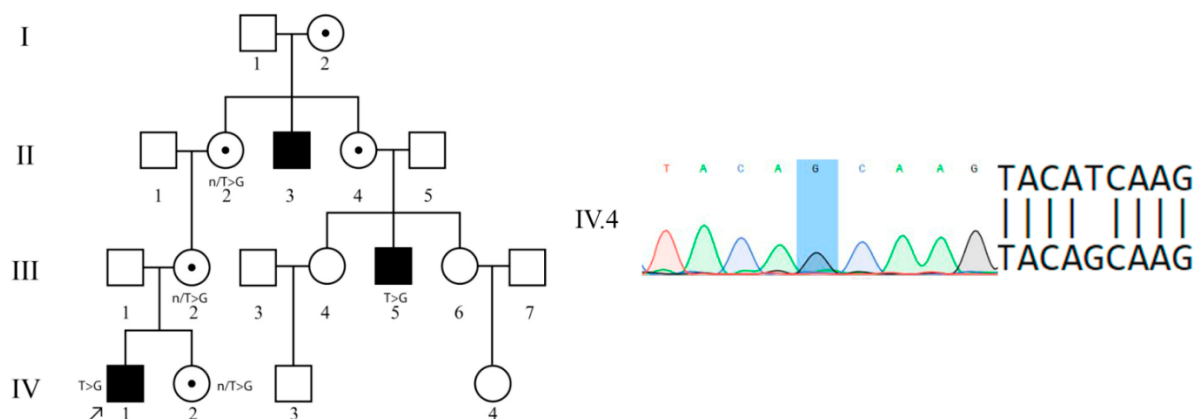

**Figure S1.** Pedigree of patient UKR1901 (IV.4) with identified novel X:67722884 T>G mutation in exon 7 of AR gene and partial electropherogram of exon 7 of androgen receptor gene sequence.

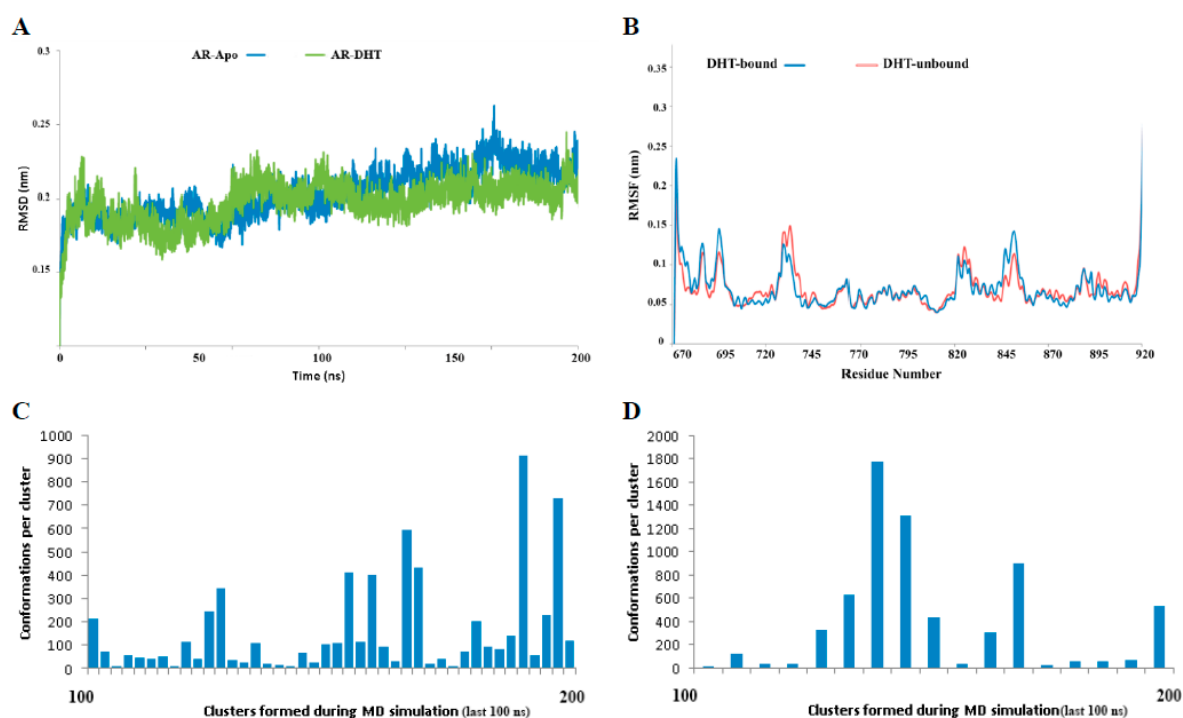

**Figure S2.** RMSD plot of the protein in the ligand-free and ligand-bound state during 200 ns MD simulations (A). Backbone-based RMSF analysis focused on each individual residue of the protein (B). Conformational space formed based on the clustering of ligand-free (C) and ligand-bound (D) proteins during last 100 ns of MD simulation.

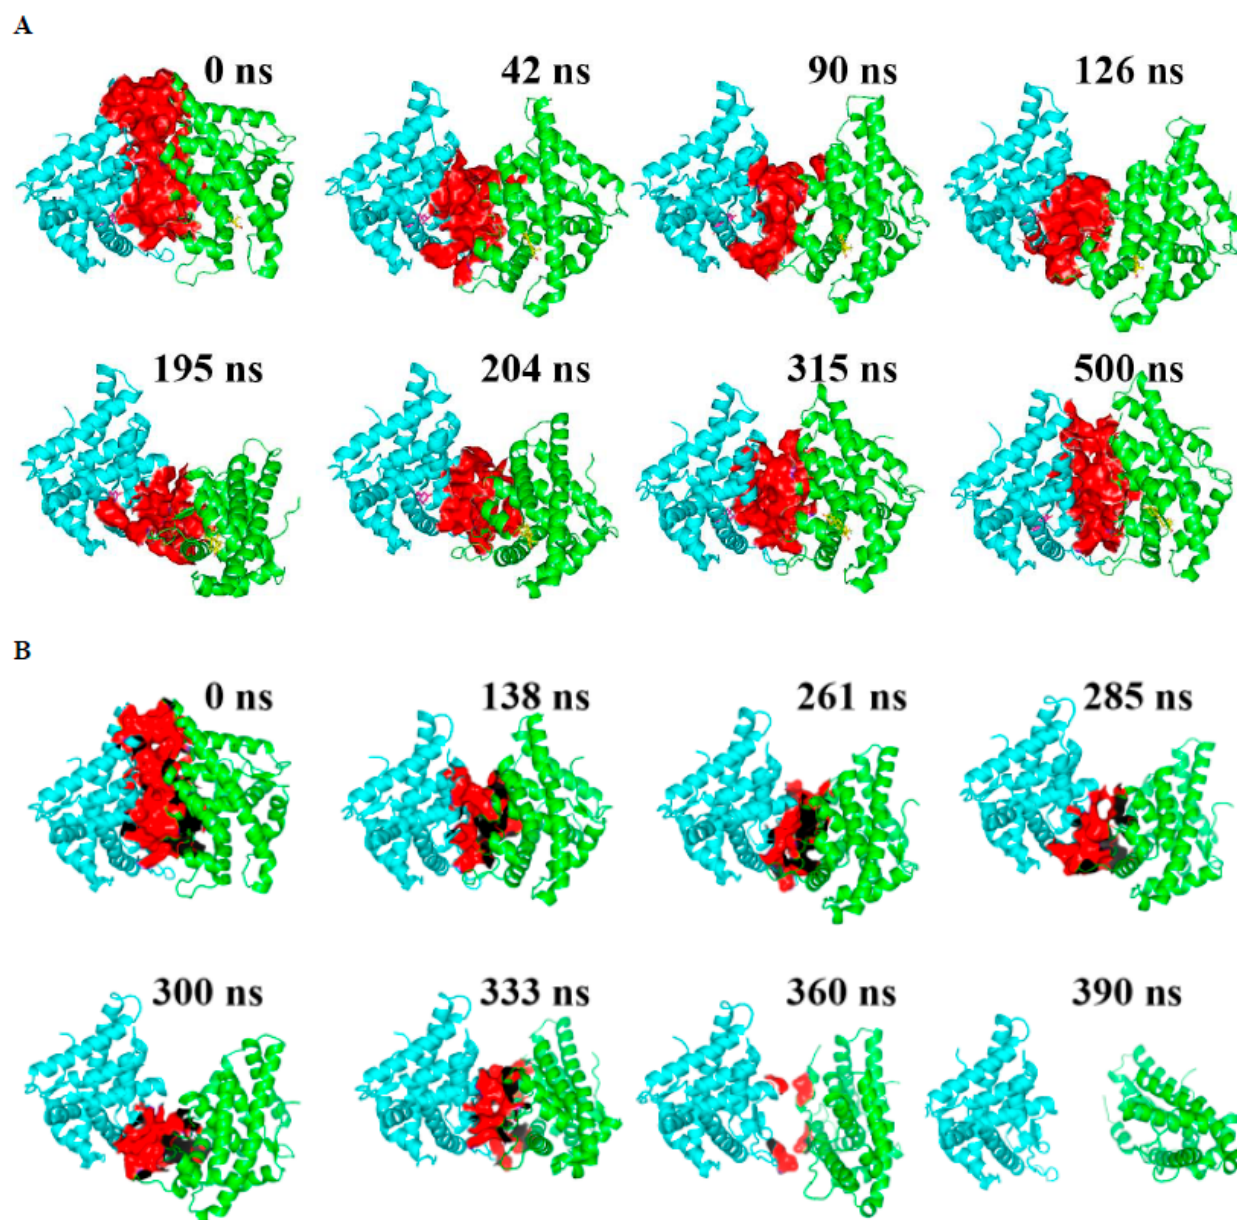

**Figure S3.** Extended layout of the ligand-induced structural changes related dimer stability. Dimer structure, colored by chain (cyan and green), with designated time-dependent protein interface (red colored surface) changes for ligand-bound (A) and –unbound AR dimer structures (B).

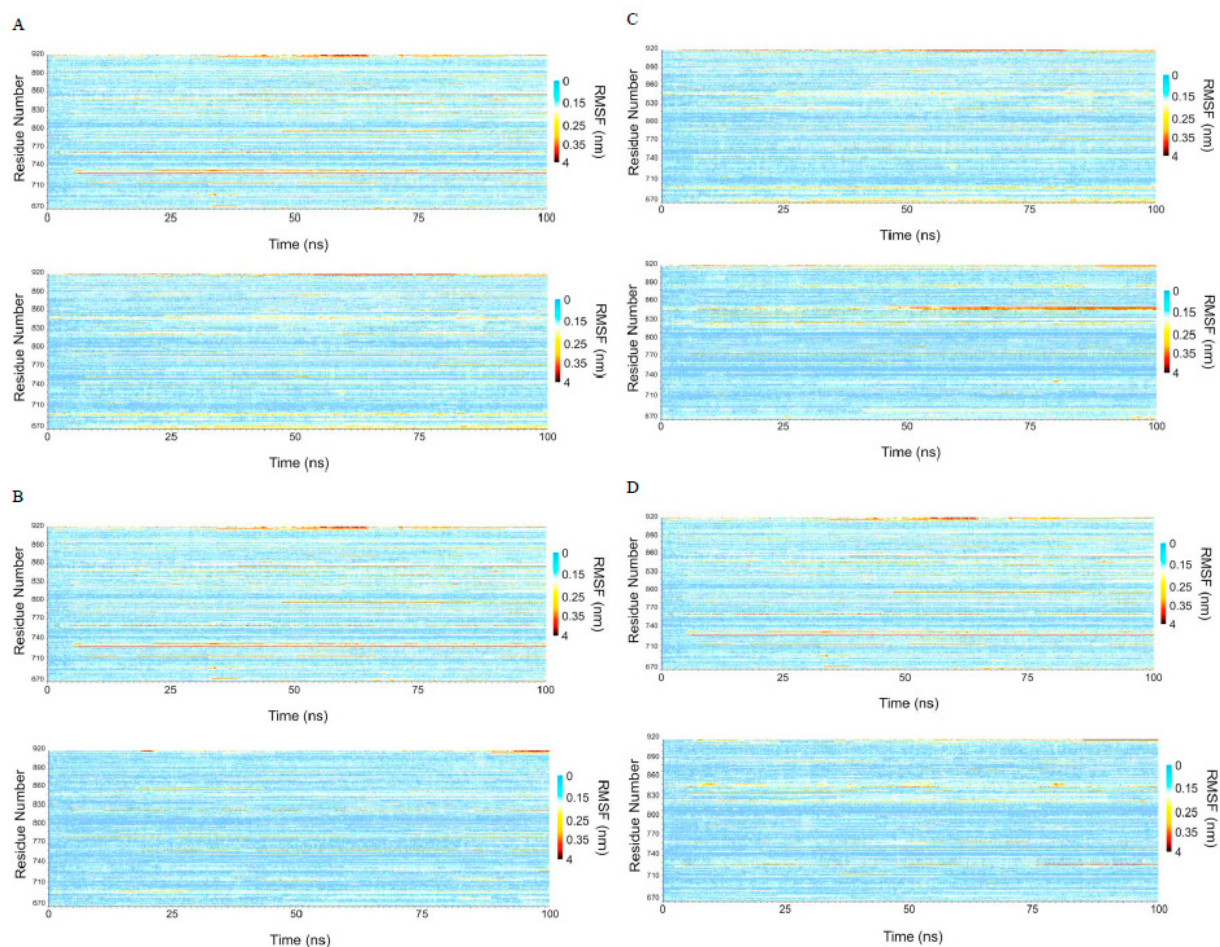

**Figure S4.** Time-resolved root mean-square fluctuations (RMSF). The amino acids with the highest mobility are shown in red and black; the most stable residues are shown in blue. (A) Time-resolved amino acid RMSFs of AR with and without DHT as ligand. (B) Time-resolved amino acid RMSFs of AR and I836S (C) Time-resolved amino acid RMSFs of ligand-bound WT and I836S. (D) Time-resolved amino acid RMSFs of AR and I836S pp mutant.

**Table S1.** The most flexible residues of AR with and without DHT.

| AR-Apo<br>Most flexible amino acids | AR-DHT<br>Most flexible amino acids |
|-------------------------------------|-------------------------------------|
| 712Q                                | 692N                                |
| 727R                                | 693N                                |
| 731V                                | 694Q                                |
| 732D                                | 742W                                |
| 761R                                | 753R                                |
| 797W                                |                                     |

**Table S2.** The most flexible residues of AR and I836S

| AR-Apo<br>Most flexible amino acids | AR-I836S<br>Most flexible amino acids |
|-------------------------------------|---------------------------------------|
| 711R                                | 695P                                  |
| 727R                                | 780R                                  |
| 728N                                | 803Q                                  |
| 758V                                | 823K                                  |

|      |      |
|------|------|
| 761R | 841R |
| 788M | 858Y |
| 797W | 872R |
| 814F |      |
| 856R |      |
|      |      |

**Table S3.** The most flexible residues of ligand-bound AR and I836S

| <b>AR-DHT</b><br><b>Most flexible amino acids</b> | <b>AR-DHT -I836S</b><br><b>Most flexible amino acids</b> |
|---------------------------------------------------|----------------------------------------------------------|
| 693N                                              | 682E                                                     |
| 694Q                                              | 683P                                                     |
| 695P                                              | 684G                                                     |
| 742W                                              | 774Y                                                     |
| 753R                                              | 841R                                                     |
|                                                   | 847R                                                     |
|                                                   | 848K                                                     |
|                                                   | 849N                                                     |
|                                                   | 850R                                                     |
|                                                   | 851T                                                     |
|                                                   | 852S                                                     |

**Table S4.** The most flexible residues of AR and I836S pp mutant.

| <b>AR-Apo</b><br><b>Most flexible amino acids</b> | <b>AR-I836S</b><br><b>Most flexible amino acids</b> |
|---------------------------------------------------|-----------------------------------------------------|
| 711R                                              | 724P                                                |
| 721K                                              | 750M                                                |
| 727R                                              | 803Q                                                |
| 728N                                              | 823K                                                |
| 729L                                              | 825Q                                                |
| 730H                                              | 837K                                                |
| 731V                                              | 841R                                                |
| 758V                                              | 850P                                                |
| 761R                                              | 855R                                                |
| 788M                                              | 872R                                                |
| 797W                                              | 886H                                                |
| 813L                                              |                                                     |
| 814F                                              |                                                     |
| 856R                                              |                                                     |

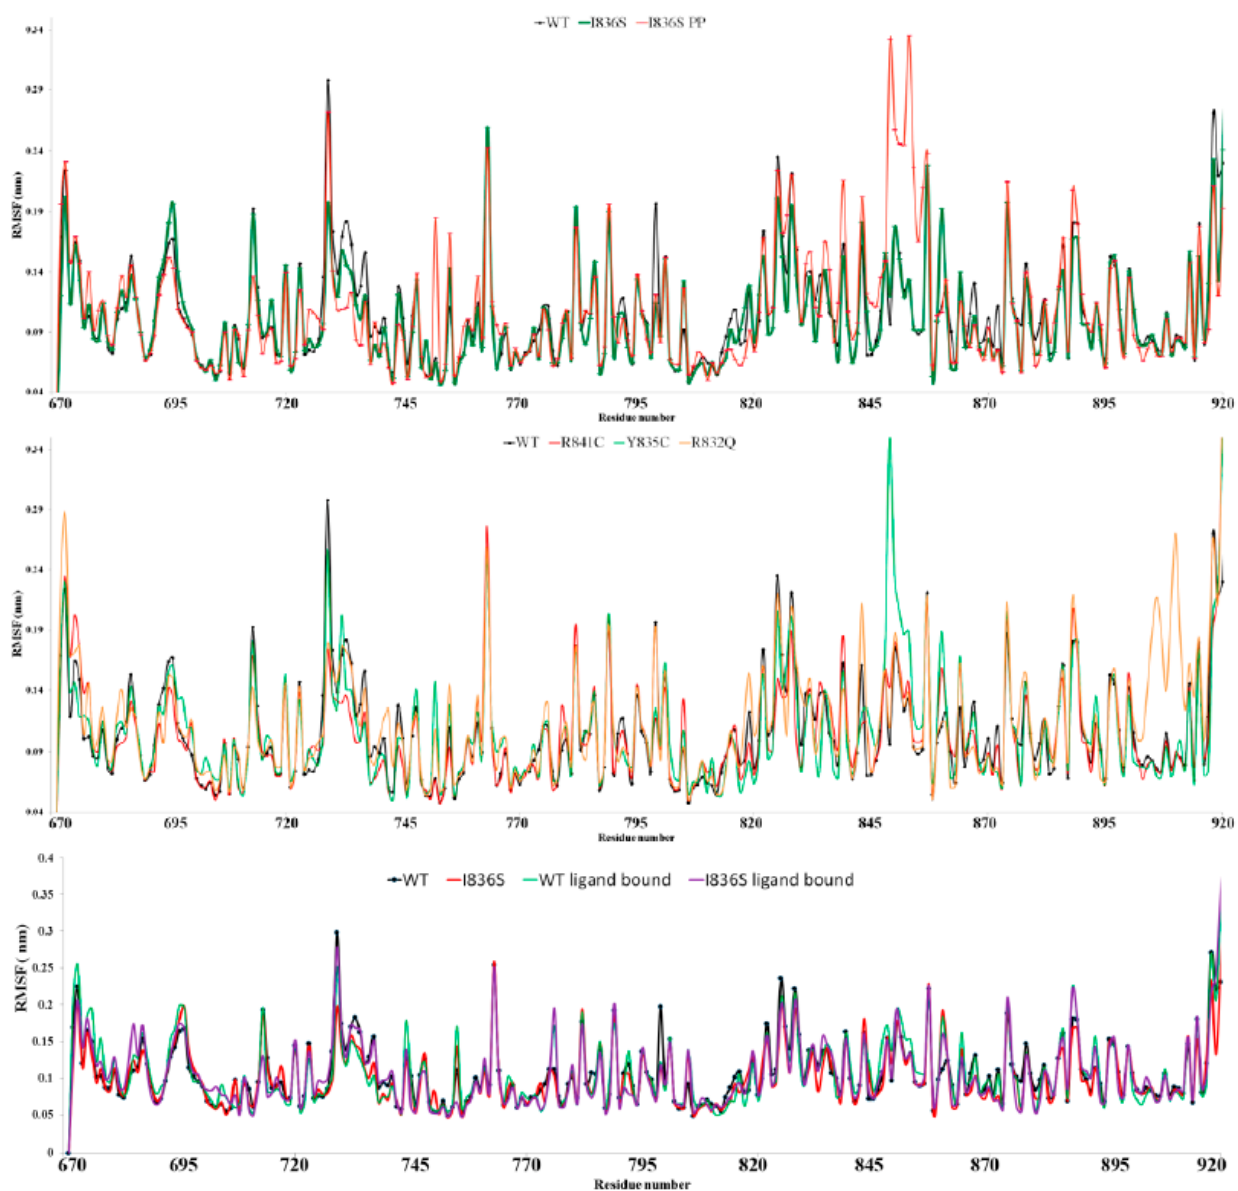

**Figure S5.** RMSF plot, containing a combined data on ligand-binding along with mutation effect (B), confirming that neither ligand-free mutant I836S protein nor its ligand-bound form demonstrate significant difference from wild-type protein.

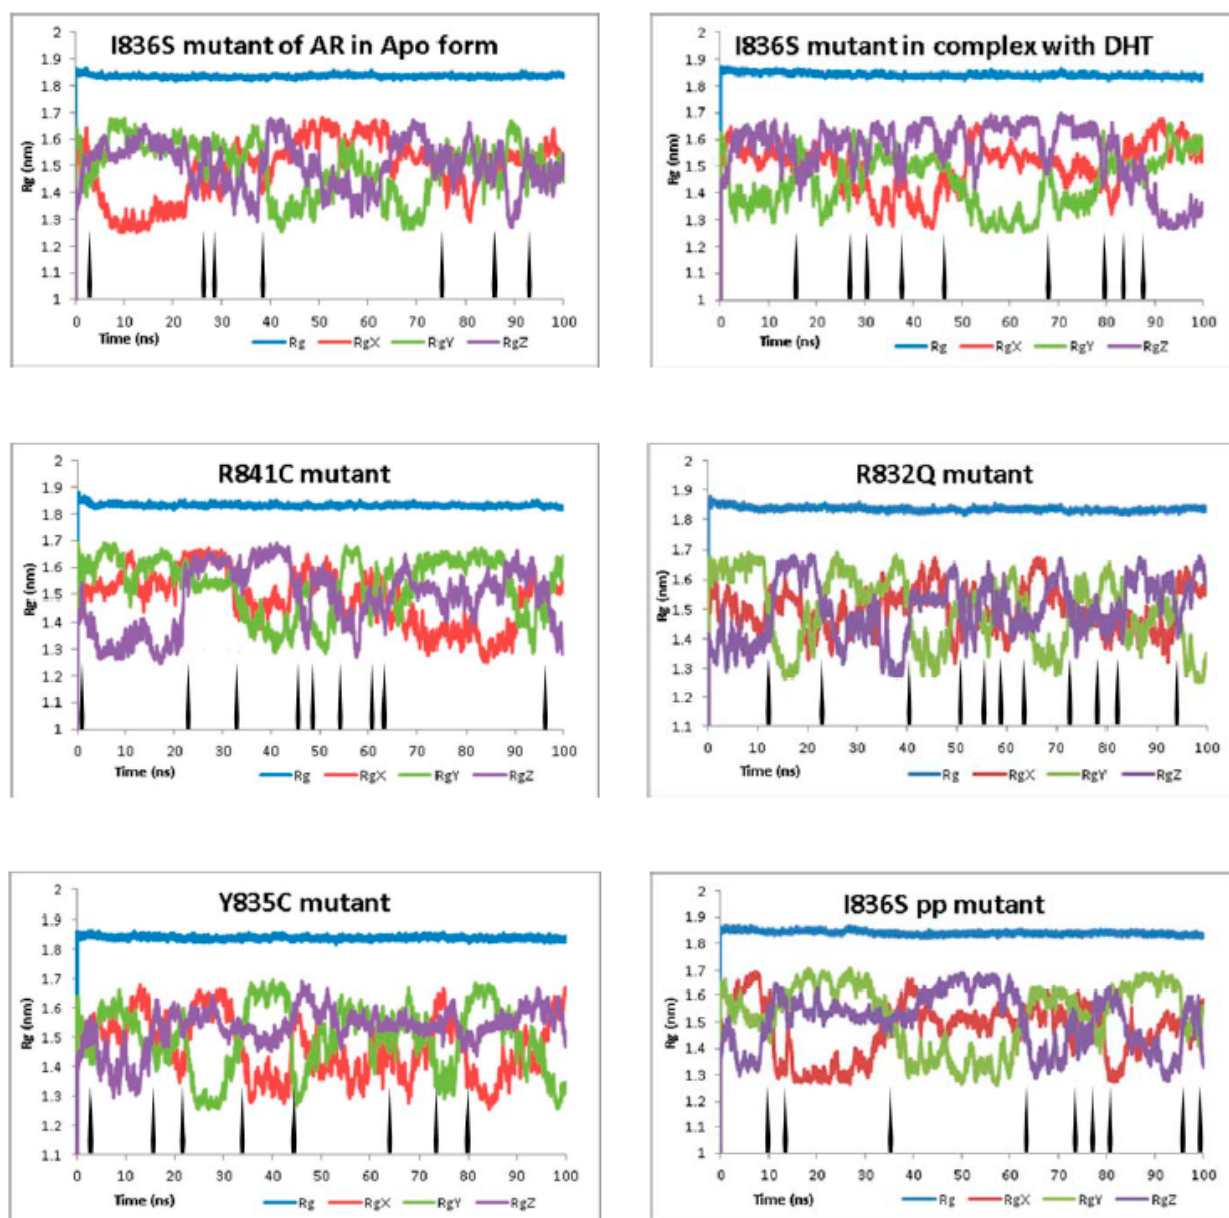

**Figure S6.** Evident decrease of the spatial structure stability represented with the Radius of Gyration graphs for each of the studied mutations. A high degree of structural flexibility correlate with the reducing of spikes/arrows amount for DHT-free mutants in comparison to the ligand bound ternary structure .
